# Supplementary material for: New short-channel SBA-15 mesoporous silicas functionalized with polyazamacrocyclic ligands for selective capturing of palladium ions in HNO3media
Source: Royal Society of Chemistry journal article supplement (doi:10.1039/c6ra11778c), 2016-01-01
Supplement: c6ra11778c1.pdf [file c6ra11778c1.pdf]

Supporting Information for

**New Short-Channel SBA-15 Mesoporous Silicas Functionalized with  
Polyazamacrocyclic Ligands for Selective Capturing of Palladium Ions in HNO<sub>3</sub>**

**Media**

Fengcheng Wu<sup>1</sup>, Gang Ye<sup>1,2,\*</sup>, Yuekun Liu<sup>1,3</sup>, Rong Yi<sup>1</sup>, Xiaomei Huo<sup>1</sup>, Yuexiang Lu<sup>1</sup> and Jing Chen<sup>1,2,\*</sup>

<sup>1</sup> *Institute of Nuclear and New Energy Technology (INET), Collaborative Innovation Center of Advanced Nuclear Energy Technology, Tsinghua University, Beijing 100084, China.*

<sup>2</sup> *Beijing Key Lab of Radioactive Waste Treatment, Tsinghua University, Beijing 100084, China*

<sup>3</sup> *Department of Engineering Physics, Tsinghua University, Beijing 100084, China.* \*Corresponding author, e-mail:

yegang@mail.tsinghua.edu.cn; jingxia@tsinghua.edu.cn.

## **Experimental details**

### **Sample preparation for XPS survey**

50 mg SBA-15-Cyclen were immersed in 1.0 mol/L HNO<sub>3</sub> solution containing 0.5 g/L Pd(II) in a 25 °C oscillator. After shaking for 48 h to reach the adsorption equilibrium, the resulting SBA-15-Cyclen-Pd were separated by centrifuging and washed with water and ethanol, respectively, followed by drying at 60 °C under vacuum for 12 h.

### **Regeneration of SBA-15-Cyclen**

The reusability of SBA-15-Cyclen was evaluated through batch adsorption-elution cycle experiments. Firstly, the Pd(II)-loaded SBA-15-Cyclen mesoporous silicas after saturated adsorption were separated by centrifuging and rinsed with deionized water and ethanol, respectively. After drying at 60 °C under vacuum, the SBA-15-Cyclen-Pd were relocated to 1% thiourea in 0.5 mol/L HNO<sub>3</sub> solutions and shaken for 4 h at 25°C. After the desorption of Pd(II), the SBA-15-Cyclen were regenerated and washed with deionized water for cycle use.
